# Supplementary material
Source: PubMed Central journal article supplement (PMC4665770)
Supplement: JCI83349.sd.pdf [file JCI83349.sd.pdf]

A

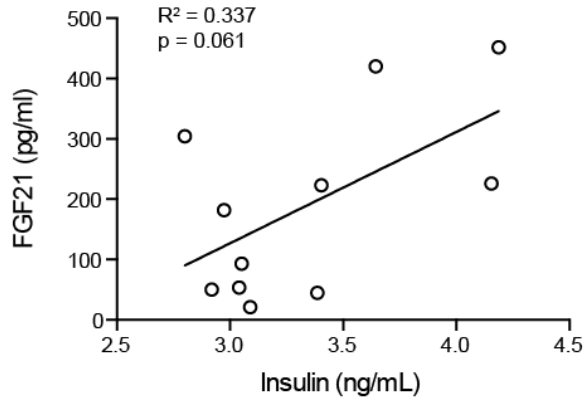

B

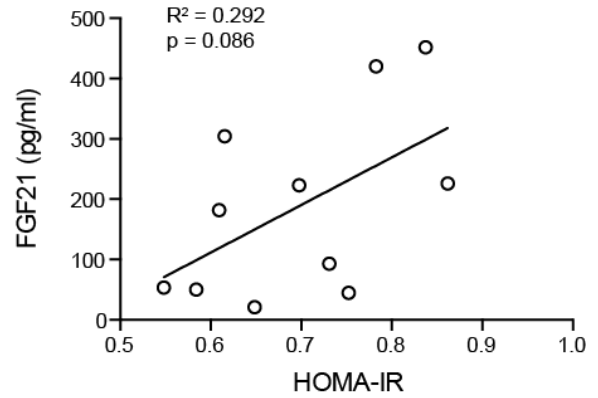

**Supplemental Figure 1. Circulating FGF21 and measures of insulin sensitivity in humans.**

A) Linear correlation between baseline circulating FGF21 levels and baseline serum insulin levels; analysis performed using least squares regression.

B) Linear correlation between baseline circulating FGF21 levels and the homeostatic model assessment for insulin resistance (HOMA-IR); analysis performed using least squares regression.

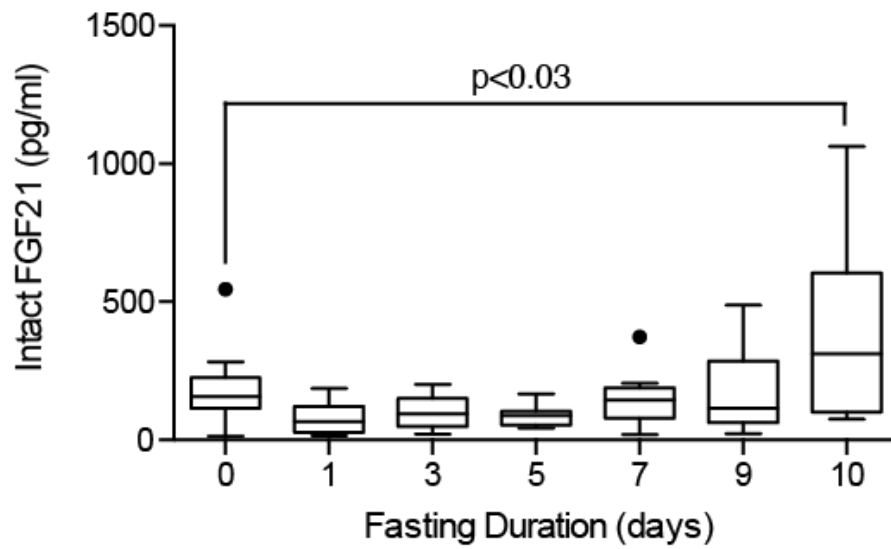

**Supplemental Figure 2. Intact FGF21 is induced by prolonged fasting in humans.**

Human samples measured and displayed in Figure 1 were reanalyzed using an ELISA assay specific for the full-length intact FGF21 protein and displayed using a Tukey box plot. Baseline and day 10 intact FGF21 levels were compared using the Wilcoxon signed-rank test.

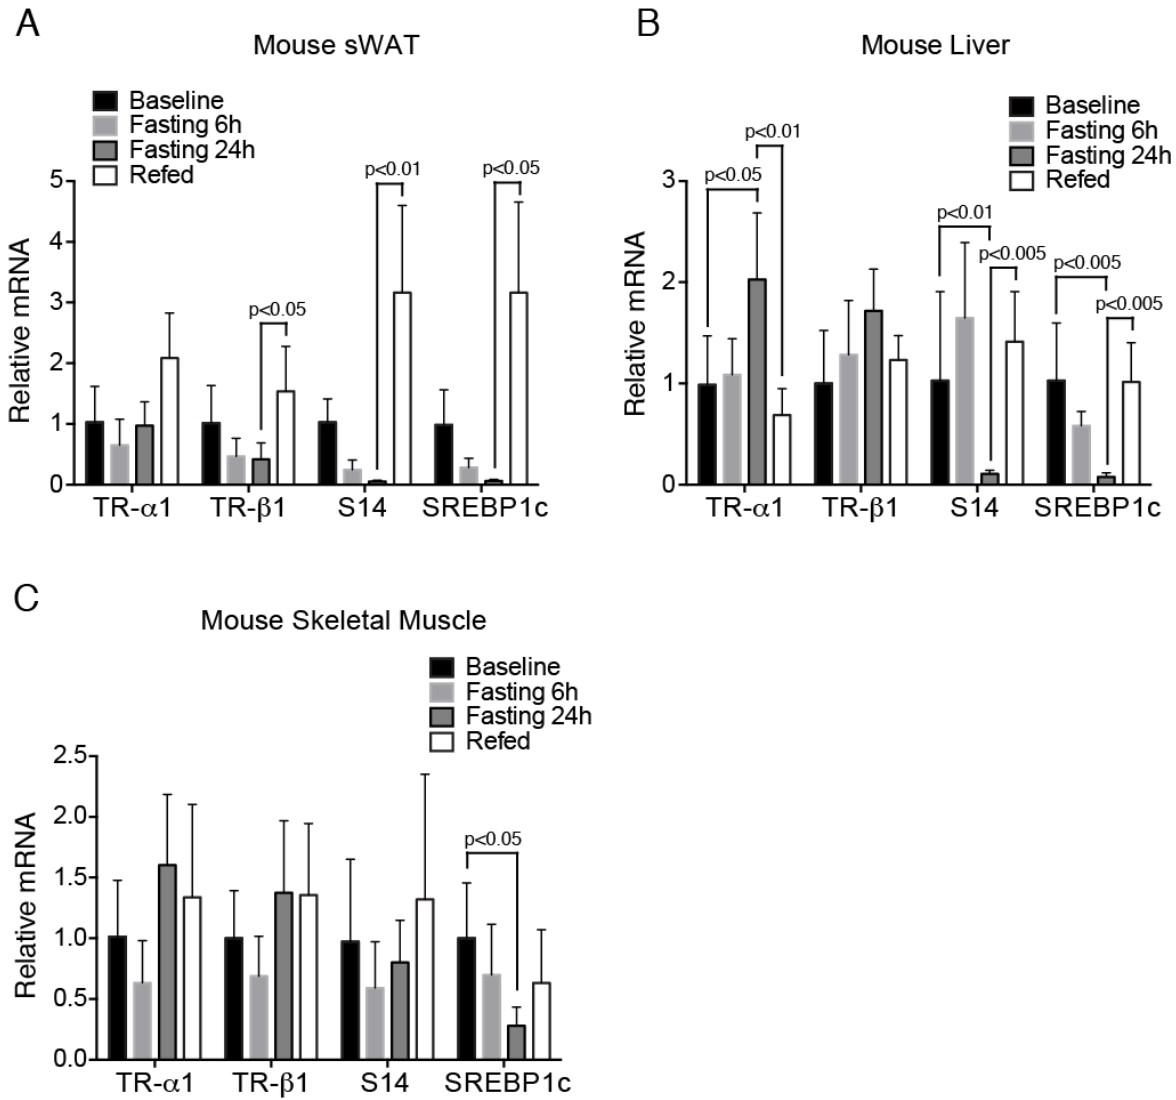

**Supplemental Figure 3. Thyroid pathway transcriptional activity during fasting and refeeding in mice.** C57Bl6 mice were fasted for 6 or 24 hours and then refed for 6 hours (n=5 per timepoint, statistical significance assigned for  $p < 0.05$ , ANOVA followed by Sidak's correction for multiple comparisons). The analysis was conducted for (A) mouse subcutaneous adipose tissue (sWAT), (B) mouse liver, and (C) mouse skeletal muscle.

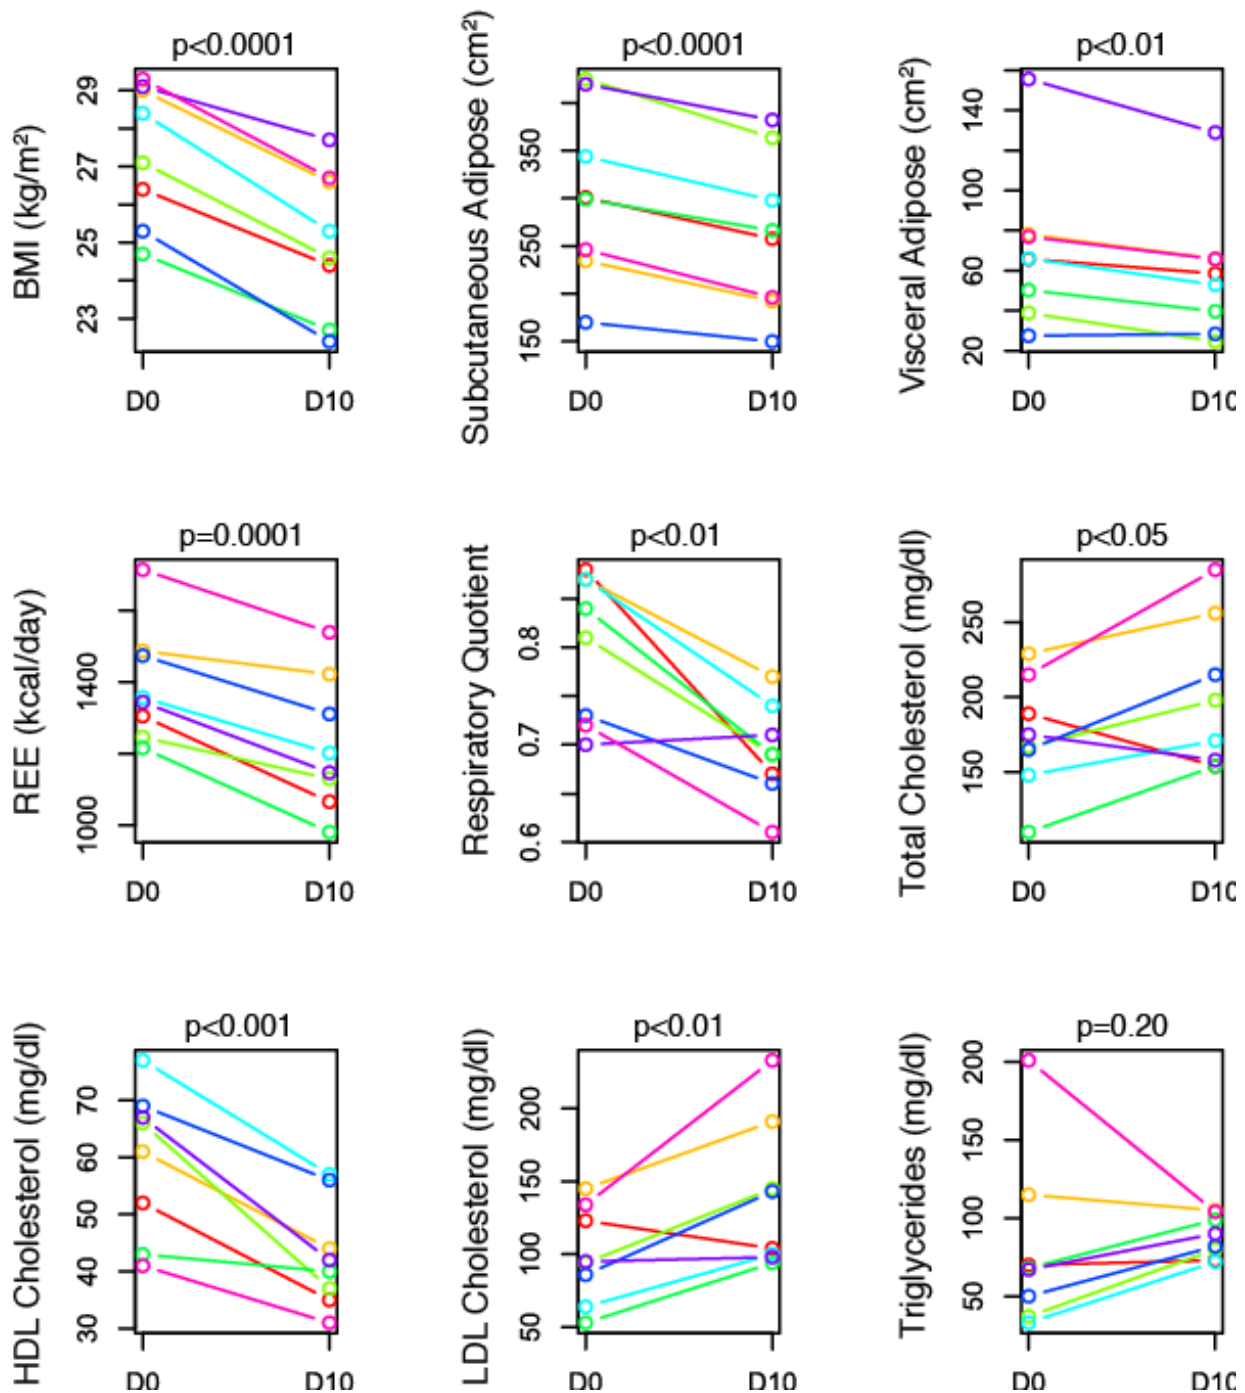

**Supplemental Figure 4. Pre- and post-fast measurements of metabolic function and body composition.** Measurements were performed at baseline (D0) and after 10 days of fasting (D10). Variables were compared with a paired t-test; for non-normally distributed data (visceral adipose tissue, respiratory quotient and triglycerides), a Wilcoxon signed-rank test was used. The subject who achieved a respiratory quotient of 0.61 was the same

subject (and only subject) who did not mount an FGF21 response to fasting (baseline FGF21 level: 452 pg/ml and final fast day FGF21 level: 230 pg/ml).

|                             | r     | 95% CI         | Adjusted P-value |
|-----------------------------|-------|----------------|------------------|
| Resting Energy Expenditure  | -0.72 | (-0.95, -0.04) | 0.35             |
| O2 Ventilation Rate         | -0.62 | (-0.92, 0.15)  | 0.7              |
| LDL cholesterol             | -0.58 | (-0.91, 0.21)  | 0.8              |
| Triglycerides               | 0.52  | (-0.29, 0.90)  | 0.94             |
| Total cholesterol           | -0.38 | (-0.86, 0.44)  | 1                |
| HDL cholesterol             | 0.32  | (-0.49, 0.84)  | 1                |
| Subcutaneous Adipose Tissue | 0.73  | (0.06, 0.95)   | 0.35             |
| Visceral Adipose Tissue     | 0.31  | (-0.5, 0.83)   | 1                |
| Body Mass Index             | 0.27  | (-0.54, 0.82)  | 1                |
| T3                          | -0.45 | (-0.88, 0.38)  | 1                |

**Supplemental Table 1. Correlation of Change in Metabolic Predictors with Day 10**

**FGF21 serum levels.** The difference between Day 10 and Day 0 observations for each predictor were analyzed for correlation with log-transformed FGF21 at Day 10. Pearson's r was calculated and reported with 95% confidence intervals (95% CI). P-values are adjusted for multiple analyses.

| <b>Human</b>   |           |                             |
|----------------|-----------|-----------------------------|
| Gene           | Direction | Sequence                    |
| <i>βKlotho</i> | F         | TTCTGGGGTATTGGGACTGGA       |
|                | R         | CCATTCGTGCTGCTGACATTTT      |
| <i>Cidea</i>   | F         | GATGCCCTCGTCATCGCTAC        |
|                | R         | GCGTGTGTCTCCCAAGGTC         |
| <i>DIO2</i>    | F         | TCCAGTGTGGTGCATGTCTC        |
|                | R         | CTGGCTCGTGAAAGGAGGTC        |
| <i>FGFR1</i>   | F         | GGCTACAAGGTCCGTTATGCC       |
|                | R         | GATGCTGCCGTACTCATTCTC       |
| <i>GLUT1</i>   | F         | ATTGGCTCCGGTATCGTCAAC       |
|                | R         | GCTCAGATAGGACATCCAGGGTA     |
| <i>PGC1α</i>   | F         | TCTGAGTCTGTATGGAGTGACAT     |
|                | R         | TCTGAGTCTGTATGGAGTGACAT     |
| <i>PPARα</i>   | F         | ATGGTGGACACGGAAAGCC         |
|                | R         | CGATGGATTGCGAAATCTCTTGG     |
| <i>PPARγ</i>   | F         | TACTGTGCGTTTCAGAAATGCC      |
|                | R         | GTCAGCGGACTCTGGATTGAG       |
| <i>PRDM16</i>  | F         | CTTCGGATGGGAGCAAATACTG      |
|                | R         | TCCACGCAGAACTTCTCACTG       |
| <i>S14</i>     | F         | CCAAGAACTGCCTGCTGACCGTCATGG |
|                | R         | GGATGTGATGGAGGCTGGAGAAGTGC  |
| <i>SREBP1c</i> | F         | CCATGGATTGCACTTTCGAA        |
|                | R         | GGCCAGGGAAAGTCACTGTCTT      |
| <i>TR-α1</i>   | F         | AGGTCACCAGATGGAAAGCG        |
|                | R         | AGTGATAACCAGTTGCCTTGTC      |
| <i>TR-β1</i>   | F         | CCAGAAGACATTGGACAAGCA       |
|                | R         | GCAGCTCACAAAACATAGGCA       |
| <i>UCP1</i>    | F         | CAATCACCGCTGTGGTAAAAAC      |
|                | R         | GTAGAGGCCGATCCTGAGAGA       |

| <b>Mouse</b>   |   |                         |
|----------------|---|-------------------------|
| <i>βKlotho</i> | F | TGTTCTGCTGCGAGCTGTTAC   |
|                | R | CCGGACTCACGTAAGTGTCTTTT |
| <i>FGF21</i>   | F | CTGCTGGGGTCTACCAAG      |
|                | R | CTGCGCCTACCACTGTTCC     |
| <i>FGFR1</i>   | F | TAATACCACCGACAAGGAAATGG |
|                | R | TGATGGGAGAGTCCGATAGAGT  |
| <i>GLUT1</i>   | F | TCAACACGGCCTTCACTG      |
|                | R | CACGATGCTCAGATAGGACATC  |
| <i>PPARα</i>   | F | AGAGCCCCATCTGTCCTCTC    |
|                | R | ACTGGTAGTCTGCAAACCAAA   |
| <i>PPARγ</i>   | F | TCGCTGATGCACTGCCTATG    |
|                | R | GAGAGGTCCACAGAGCTGATT   |
| <i>S14</i>     | F | ATGCAAGTGCTAACGAAACGC   |
|                | R | CCTGCCATTCTCCCTTGG      |

|                                |   |                        |
|--------------------------------|---|------------------------|
| <i>SREBP1c</i>                 | F | GGAGCCATGGATTGCACATT   |
|                                | R | GCTTCCAGAGAGGAGGCCAG   |
| <i>TR-<math>\alpha</math>1</i> | F | TGCCTTTAACCTGGATGACAC  |
|                                | R | TCGACTTTCATGTGGAGGAAG  |
| <i>TR-<math>\beta</math>1</i>  | F | AGCCAGAACCCACGGATGAGGA |
|                                | R | TGCCACCTTCTGGGGCATTAC  |
| <i>S14</i>                     | F | CAATCACCGCTGTGGTAAAAAC |

**Supplemental Table 2. qPCR primers.** For analysis of human FGF21 transcription, a previously validated Taqman primer set was utilized (Life Technologies, Hs00173927\_m1).
